# Supplementary material
Source: HighWire-hosted journal article supplement (https://jitc.bmj.com/content/9/6/e002605)
Supplement: inline-supplementary-material-1 [file inline-supplementary-material-1.pdf]

## DATA SUPPLEMENT

### Identification and validation of expressed HLA-binding breast cancer neoepitopes for potential use in individualized cancer therapy

Hannah Reimann, Andrew Nguyen, J. Zachary Sanborn, Charles J. Vaske, Stephen C. Benz, Kayvan Niazi, Shahrooz Rabizadeh, Patricia Spilman, Andreas Mackensen, Matthias Ruebner, Alexander Hein, Matthias W. Beckmann, Edith D. van der Meijden, Judith Bausenwein, Sascha Kretschmann, Marieke Griffioen, Jeffrey Schlom, James L. Gulley, Karin L. Lee, Duane H. Hamilton, Patrick Soon-Shiong, Peter A. Fasching, Anita N. Kremer

### METHODS

#### *In vitro* peptide HLA-A2 binding assay

For the determination of the *in vitro* HLA-A2 binding affinity of synthesized peptides, T2A2 cells were cultured with 50 µg/mL of the indicated peptides overnight at 37°C. The binding of exogenous peptide stabilizes the HLA-A2 complex on the surface of the TAP-deficient T2A2 cells. The affinity of the peptide to bind the HLA-A2 molecule is assessed via flow cytometry as function of increased HLA-A2 mean fluorescent intensity. FITC-labeled anti-HLA antibodies were purchased from One Lambda, and data was acquired using a FACS Calibur Flow cytometer (BD Biosciences).

#### *In vitro* generation of neoepitope-specific T cells from healthy donors

Peripheral blood from healthy donors was obtained under the appropriate Institutional Review Board (IRB) approval and with informed consent. Neoepitope-specific T cells were generated from HLA-A2 expressing healthy donor peripheral blood mononuclear cells (PBMCs) using three rounds of *in vitro* stimulation. For each round of stimulation, dendritic cells (DCs) were prepared from PBMCs by plating  $2 \times 10^7$  cells/well in 6-well plates in AIM V medium (Invitrogen). Cells were allowed to adhere for 2 to 4 hours at 37°C. Following incubation, non-adherent cells were removed, and remaining cells were washed once with PBS and incubated in AIM V media containing 100 ng/mL granulocyte-macrophage colony-stimulating factor (GM-CSF; Peprotech) and 20 ng/mL interleukin-4 (IL-4; Peprotech). Cytokine-containing media was changed every 48 hours for 5 days. On day 5, DCs were matured for 1 to 2 days with CD40L (0.5 µg/mL; Enzo Life Sciences) in the presence of a cross-linking enhancer (1 µg/mL). After maturation, DCs were peptide-pulsed with MDA-MB-231 derived 9-mer neoepitopes (20 µg/mL) in RPMI media containing 10% (v/v) human AB serum for 1 hour. For the first round of *in vitro* stimulation,  $2 \times 10^6$  autologous PBMCs were added per well following peptide incubation. After 48 hours, 100 ng/mL each of IL-15 (Peprotech) and IL-7 (Peprotech) were added to each well and cytokines were replenished every 2 to 3 days for 7 days. For subsequent rounds of *in vitro* stimulation, DCs were peptide pulsed for 1 hour as described above. T cells were harvested from the previous round of *in vitro* stimulation, counted, and added to new DCs in 2 mL media. IL-15 and IL-7 were added to media

every 2 days. Following the third round of *in vitro* stimulation, CD8<sup>+</sup> T cells were isolated using a negative selection (Miltenyi Biotec). Purified CD8 cells rested in media containing IL-15 and IL-7 prior to assessment of either their cytotoxicity or antigen-dependent IFN- $\gamma$  secretion.

## Neoepitope prediction for two TILGen subjects

### *Preclinical validation of neoepitope prediction in BC patients*

From two TILGen study<sup>1,2</sup> patients, peripheral blood and tumor tissue were obtained after approval by the internal Institutional Review Board (IRB) and with informed patient consent according to the Declaration of Helsinki. Briefly, the TILGen (TILs and genomics) study was a predefined substudy of the iMODE-B (imaging and molecular detection of breast cancer) study. iMODE-B is concerned with molecular markers at the time of breast cancer diagnosis or progression, molecular detection, and imaging detection of breast cancer. The TILGen study focused on the identification of antigen-specific TILs in TNBC and HER2-positive breast cancer patients in order to identify immunogenic targets that could help to improve cancer immunotherapy. Patients were eligible for inclusion in the iMODE-B study if an indication existed for a diagnostic biopsy because of a suspicious breast lesion.<sup>1,2</sup> Peripheral blood was obtained for the isolation of germline DNA and generation of antigen-presenting cells (APC) (Epstein-Barr Virus (EBV)-transformed B cells and monocyte-derived DCs). Tumor material was obtained by ultrasound guided needle-core biopsy for DNA extraction and expansion of TILs. One patient with HER2<sup>+</sup> BC (TILGen 1) and another with TNBC (TILGen 2) were the initial patients tested for neoantigen-reactivity. Both received neoadjuvant chemotherapy according to standard of care and had pathological complete responses. For patient 1, resected tissue from the primary breast tumor site after neoadjuvant chemotherapy was available in addition to the initial biopsy and underwent analysis.

### *Generation of autologous dendritic cells (DCs)*

DCs of the two breast cancer patients were generated from monocytes isolated from autologous PBMCs by magnetic separation as described in the Data Supplement. Monocytes ( $1 \times 10^6$  /mL RPMI) were incubated with 560 U/mL GM-CSF (Miltenyi Biotec) and 500 U/mL IL-4 (Peprotech). On day 5, 200 U/mL TNF $\alpha$ , 2000 U/mL IL-1 $\beta$ , 1600 U/mL IL-6, 560 U/mL GM-CSF, 500 U/mL IFN- $\gamma$  (all Miltenyi Biotec) and 1  $\mu$ g/ml PGE-2 (Enzo) were added. DCs were harvested on day 6 to 7 and subsequently used for stimulation.

### *Peptide pulsing of stimulator cells*

Before pulsing, peptides were dissolved in DMSO and diluted in RPMI. Peptide pulsing was performed by incubating stimulator cells for 2 hours with synthetic peptides (1  $\mu$ g/mL or as indicated) in RPMI containing 2% human serum. Peptide-pulsed cells were washed and subsequently used as stimulator cells. Alternatively, MCF-7 cells ( $5 \times 10^6$  / ml RPMI) were lysed in three subsequent freeze-thawing cycles (liquid nitrogen to 37°C)

followed by loading of 100  $\mu$ L of those cell lysates onto EBV-LCLs. T-cell activation was measured either as cytokine release by IFN- $\gamma$  ELISA (Invitrogen) according to the manufacturer's instructions or as upregulation of CD137 in flow cytometry. For blocking experiments, HLA class I (W6/32; Biolegend) and HLA class II (PdV5.2; Santa Cruz Biotechnology) blocking antibodies were added at 2  $\mu$ g/mL to the co-culture 30 minutes before addition of the T-cell clone.

### *Retroviral transduction of BC-derived neoantigens and HLA alleles*

To confirm processing and presentation of neoantigens when endogenously expressed, total RNA from patient-derived EBV-LCLs was obtained using RNeasy Mini columns (Qiagen) and transcribed into cDNA by reverse transcriptase using the One Taq RT-PCR Kit (New England Biolabs, Germany). HLA restriction molecules and RBMX, PNMAL1 and CARS2 wildtype (wt) were amplified with specific primers and PNMAL1 P100R, CARS2 Q171H and RBMX T55I were generated by a 2-step PCR with oligos encoding the single nucleotide mutation (see all oligos and plasmids in Table S4). HLA-DQ and -DP  $\alpha$ - and  $\beta$ - chains were fused by a T2A linker. PCR products were cloned into retroviral vector MP71 or pLZRS, including the marker genes  $\Delta$ NGFR or GFP. Inserted PCR products were verified by sequencing. Wild-type  $\phi$ nx A packaging cells were transfected with these vectors as described previously.<sup>3</sup> Viral supernatants were used for transduction of EBV-LCL, class II negative HeLa or MCF-7 cells on plates coated with 30  $\mu$ g/ml recombinant human fibronectin CH296 (RetroNectin; Takara Bio). Expression of the transgenes was verified by marker gene expression and/or surface expression of HLA class II alleles.

### *Flow cytometry*

For flow cytometric analysis and/or isolation of cells, the following antibodies were used: CD3 labelled with FITC or BV (Brilliant Violet) 510, APC-Cy7 or APC-labeled CD8, BV421-labelled CD4, PE-labelled CD137 and NGFR (all BD Sciences), as well as PE-labelled HLA-DP (Leinco). IFN- $\gamma$  producing cells were PE-labelled by using the cytokine secretion assay (Miltenyl Biotech) followed by flow cytometric sorting (Aria II, BD). The IOTest Beta Mark TCR V $\beta$  Repertoire Kit (Beckman Coulter), which enables the identification of 24 different specificities, was used to determine the T-Cell Receptor (TCR) variable beta chain of different T-cell clones.

### *TCR sequencing and clonotypic PCR*

For TCR sequencing, RNA of T-cell clones was isolated using an RNeasy mini kit according to the manufacturer's protocol, including QIA shredder and DNase digestion (all Qiagen). cDNA was generated using SMARTScribe Reverse Transcriptase (Clontech) and 1  $\mu$ M dNTPs (Roche) with an oligo in the constant  $\beta$  chain region (5'-CAGTATCTGGAGTCATTGA-3') and a target switching RNA anchor with added ribosomal guanine residues (5'-AAGCAGTGGTATCAACGCAGAGTACggg-3') as described previously.<sup>4</sup> In a second PCR step, amplification of the variable region was performed by using the Pwo SuperYield DNA Polymerase (Roche) according to the

manufacturer's instructions. Oligos included an anchor specific primer (5'-AAGCAGTGGTATCAACGCAGAGT-3') used in combination with a more proximal primer within the constant region (5'-CACGTGGTCGCGGWAGAAGC-3'). PCR was performed with 33 cycles, an annealing temperature of 59°C, and 1 minute of extension time. Resulting PCR bands were purified via gel electrophoresis, excised, and sequenced. Sequencing was performed using 5 µL of DNA (100 ng/µL) mixed with 5 µL of the respective primer followed by Sanger sequencing at GATC Biotech (Germany). Analysis of the resulting sequences was performed using the International Immunogenetics Information Systems.<sup>5</sup>

For clonotypic PCR, forward primers were designed to bind in the highly variable CDR3 region, while reverse primers bound in a distance of 70 to 120 bp. The following primers were used: 3E1 fw: 5'-CAATGGCTACAATGTCTCCAGATTAA-3', 3E1 rv: 5'-AGGCACTGCTGGCACAGA-3'; E15 fw: 5'-TCAGGGCGCCAGTTCTCTAA-3', E15 rv: 5'-CCTAAGCTGCTGGCGCAA-3'; G44 fw: 5'-CAGGAATGCCAAAGGAACGATT-3', G44 rv: 5'-CTGGTGAGCTGGCACAGAA-3'; 1A35 fw: 5'-ATCCGTCTCCACTCTGAAGATC-3', rv: 5'-TTCAGTGTTGCTCCCTAAGCT-3'. PCR was done in 10 µL reaction mix containing 100 ng of cDNA with 100 nM of each primer and 5 µL of the SYBR Select Master Mix (Thermo Scientific). Amplification was performed with 2 minutes at 50°C, 2 minutes at 95°C, followed by 65 cycles of 3 seconds at 95°C, 30 seconds at 59°C. β-Actin was used as a housekeeping gene: fw: 5'-CCGAGGACTTTGATTGCACA-3', rv: 5'-AGTGGGGTGGCTTTTAGGAT-3'. To verify specific amplification of qPCR products, they were Sanger sequenced using the described primers.

### *Immunoblotting*

Cells ( $5 \times 10^6$  cells/sample) were lysed on ice in 70 µL RIPA buffer (50 mM Tris, 150 mM NaCl, 1% Triton X-100, 50 mM NaF, 0.2 mM Na<sub>3</sub>VO<sub>4</sub>, pH 7.4) supplemented with protease inhibitors (Roche) for 30 minutes. Cytosolic proteins were isolated from supernatants after centrifugation at 16.000 x g (20 min, 4°C) and protein concentration was determined by Pierce BCA Protein Assay Kits (Thermo Fischer Scientific). Protein lysate (15 µg) was separated by SDS-PAGE for 1 hour at 120 V using precast Mini-PROTEAN TGX 4–15% gradient gels (Bio-Rad) and blotted on 0.2 µm Trans-Blot Turbo polyvinylidene difluoride membranes (Bio-Rad). Proteins were detected by rabbit anti-CARS2 antibody (Sigma-Aldrich), mouse IgG1 anti β-Aktin (Santa Cruz), and visualized by the WesternDot 625 goat anti-rabbit Western blot kit according to the manufacturer's protocol (Life Technologies).

**Table S1.** HLA-A2 restricted neoepitopes identified in the MDA-MB-231 cell line. Highlighted rows indicate the 20 peptides that were synthesized for further *in vitro* analysis.

| Gene Name | Transcripts per million | Affinity (nM) | Neopeptide |
|-----------|-------------------------|---------------|------------|
| RTTN      | 6.42                    | 6             | GLQDCLHSV  |
| PIGO      | 18.88                   | 7             | LLIAHFLGV  |
| SLC17A5   | 29.48                   | 9             | GTIGFWFV   |
| MUC4      | 3.92                    | 15            | LLVTSLSV   |
| ENTPD7    | 4.57                    | 23            | FLRQWVAF   |
| PITPNM2   | 7.14                    | 25            | NVFDVVMHV  |
| ARFGAP1   | 48.51                   | 27            | SLLPHKHVV  |
| KIF13B    | 8.47                    | 28            | TLTHILYDV  |
| RTN4      | 422.86                  | 31            | AMAKIQAKV  |
| ZNF703    | 50.98                   | 34            | LLNPHTLGL  |
| NCAPD3    | 39.7                    | 34            | YLEYGLHAA  |
| RANBP2    | 35.47                   | 35            | FLTNDETKV  |
| ADGRG6    | 29.04                   | 35            | SLQGLFILI  |
| HAUS3     | 17.76                   | 39            | SLVQHQLAV  |
| SLC17A5   | 29.48                   | 42            | GIFWVFLWI  |
| DNAH14    | 10.31                   | 45            | ILIQELEEI  |
| YIPF1     | 19.35                   | 64            | AMLVFAIAI  |
| IDUA      | 7.58                    | 80            | LLSNDNALL  |
| PRR16     | 5.21                    | 84            | SVHHYAWVV  |
| RFX2      | 4.45                    | 93            | SMVGITMDI  |
| ZCCHC7    | 17.23                   | 96            | NLVGYENSV  |
| KMT2C     | 17.49                   | 98            | QMYHYSCAA  |
| TCF25     | 38.79                   | 99            | ILCEIKEAV  |
| ATP13A1   | 36.77                   | 105           | ALASCHLLM  |
| COMMD8    | 26.81                   | 116           | ALSSDTIAA  |
| MUC4      | 3.92                    | 129           | LLVTNASSV  |
| DYM       | 12.99                   | 130           | RLLQSGAEL  |
| PIGO      | 18.88                   | 150           | TMDSGEWDL  |
| ATP11A    | 20.46                   | 173           | HMQDYGLII  |
| SLC17A5   | 29.48                   | 175           | WFVLWIWLV  |
| C10orf88  | 8.52                    | 187           | HIDDNIALL  |
| ADAM8     | 87.28                   | 191           | GLLGDSSEA  |
| IDUA      | 7.58                    | 198           | ALLSNDNAL  |
| HERC2     | 12.92                   | 218           | LLLLQLWYS  |
| ENTPD7    | 4.57                    | 218           | RQWVAFGL   |
| RTN4      | 422.86                  | 271           | KIQAKVPGL  |
| SLC17A5   | 29.48                   | 288           | ILLSLRNQL  |
| TLN1      | 208.07                  | 290           | KQAAHTLEA  |
| PRDM2     | 12.1                    | 320           | KIQDIQLKI  |
| USP5      | 53.58                   | 360           | GLGGLPNIV  |
| COMMD8    | 26.81                   | 365           | KLALSSDTI  |
| GTF3C1    | 29.64                   | 385           | FIGRPWHVV  |
| PANK2     | 26.55                   | 410           | RLLLRMGGV  |
| PITPNM2   | 7.14                    | 415           | VMHVHYPVA  |
| DPY19L4   | 14.75                   | 428           | KLIASILYQ  |
| ASPM      | 40.59                   | 430           | MLKPSTLII  |
| SLC18A2   | 5.14                    | 433           | FANMGIALTL |
| YIPF1     | 19.35                   | 445           | WICAMLVFA  |
| DPY19L4   | 14.75                   | 464           | QQMSLYPKL  |
| RFC1      | 30.26                   | 468           | KQNWRLIPA  |

**Table S2.** All peptides used for screening T-cell reactivities in HER2+ TILGen patient 1 are shown. For HLA class I, all predicted neoepitopes were used as 9-mer peptides. For HLA class II, fusion peptides were generated for each mutation predicted to bind.

| No. | Gene   | Mutation      | Sequence   | HLA class | No. | Gene    | Mutation | Sequence                       | HLA class |
|-----|--------|---------------|------------|-----------|-----|---------|----------|--------------------------------|-----------|
| 1   | RBMX   | p.T55I        | SRGFAFVIF  | I         | 21  | CDK20   | p.I135M  | DLKPANLLMSASGQLKIADFG          | II        |
| 2   | RAB1B  | p.L186V       | RPNVKIDST  | I         | 22  | SLCO2B1 | p.R369C  | QFIKVFPVRVLLQTLCHPIFLLVLSQVC   | II        |
| 3   | GOLGA3 | p.H1486Tfs*35 | PRGDPQRTV  | I         | 23  | ABAT    | p.R450Q  | DSIQNKILILIARNKGVVL            | II        |
| 4   | PARP9  | p.G383V       | LVTKVFNLF  | I         | 24  | RRN3    | p.S199L  | TCHRALQIIARIYVPLTPWFLMPILVEKFP | II        |
| 5   | BAIAP2 | p.N339K       | DSYSKTLPV  | I         | 25  | FAM204A | p.D141E  | WKELTQYFGVNDRFEP               | II        |
| 6   | PTHLH  | p.D99del      | FGSDEGRYL  | I         | 26  | SLC1A4  | p.A516F  | EETSPLVTHQNPFPGPVAS            | II        |
| 7   | SLC1A4 | p.A516F       | NFFGFPVASA | I         | 27  | PARP9   | p.G383V  | AKQFQRSQLVLVTKVFNLFCKYIYHVLWH  | II        |
| 8   |        |               | PLVTHQNPFF | I         | 28  | RBMX    | p.T55I   | DRETNKSRGFAFVIFESPADAKDAA      | II        |
| 9   | DOK7   | p.S56R        | LRERSRLTL  | I         |     |         |          |                                |           |
| 10  | HELLS  | p.H535R       | EREKNMRSF  | I         |     |         |          |                                |           |
| 11  |        |               | RYVPLTPWF  | I         |     |         |          |                                |           |
| 12  |        |               | VPLTPWFLM  | I         |     |         |          |                                |           |
| 13  |        |               | ARYVPLTPW  | I         |     |         |          |                                |           |
| 14  |        |               | YVPLTPWFL  | I         |     |         |          |                                |           |
| 15  |        |               | LLMSASGQL  | I         |     |         |          |                                |           |
| 16  | CDK20  | p.I135M       | MSASGQLKI  | I         |     |         |          |                                |           |
| 17  |        |               | KPANLIMSA  | I         |     |         |          |                                |           |
| 18  |        |               | LWTEMITNI  | I         |     |         |          |                                |           |
| 19  | ANAPC1 | p.T416M       | CIDHLWTEM  | I         |     |         |          |                                |           |
| 20  |        |               | WTEMITNIR  | I         |     |         |          |                                |           |



**Table S3.** All peptides used for screening T-cell reactivities in TNBC TILGen patient 2 are shown. For HLA class I (left), all predicted neopeptides were used as 9-mer peptides. For HLA class II (right), fusion peptides were generated for each mutation predicted to bind.

| No. | Gene     | Mutation | Sequence  | HLA class | No. | Gene      | Mutation | Sequence                      | HLA class |
|-----|----------|----------|-----------|-----------|-----|-----------|----------|-------------------------------|-----------|
| 1   | HEBP2    | p.F142S  | RSSDGFSSA | I         | 27  | DCUN1D2   | p.D150A  | LKATAKFKDQYQFTTF              | II        |
| 2   | DCUN1D2  | p.D150A  | ATAKFKDFY | I         | 28  | SLC30A5   | p.M748I  | SGLSTGFHDVLAITKQMESMK         | II        |
| 3   | BHLHE40  | p.T163S  | SRDLKSSQL | I         | 29  | IFT172    | p.F1340H | FQRNMEVVLAVGHQLIGIGHSSAAEL    | II        |
| 4   |          |          | AKHENSRL  | I         | 30  | HEBP2     | p.F142S  | FIEDRAEMTVFVRSSDGFSSAQ        | II        |
| 5   | CARS2    | p.Q171H  | RVTENIFHI | I         | 31  | FUS7      | p.E223K  | TKDREGKVIYAYHAA               | II        |
| 6   | SLC30A5  | p.M748I  | ITKQMESMK | I         | 32  | BHLHE40   | p.T163S  | AKHENSRLKSSQLVTHLR            | II        |
| 7   | CSF1R    | p.D698G  | GYNHLEK   | I         | 33  | EMILIN2   | p.K182R  | KEGFQELQERKIQVLEEKVLRTR       | II        |
| 8   | ECI1     | p.Y136D  | LRLDQSNLV | I         | 34  | GIT2      | p.T309S  | DAVNLATQNSALVSETTVVFLPVNFE    | II        |
| 9   | NUP160   | p.L308V  | KVRMSYKE  | I         | 35  | CARS2     | p.Q171H  | LPPTVILRVENIPIHSFIEGIIAR      | II        |
| 10  | MTMR12   | p.R642H  | KVWAQHYLR | I         | 36  | CDC45     | p.L202V  | FRFDSRVKTFPGVTFPAAGERIY       | II        |
| 11  |          |          | HYLRWIFEA | I         | 37  | DOB2      | p.V164L  | IKGAAMHFRYNLIVLGRY            | II        |
| 12  | FUS7     | p.E223K  | KTKDREGKK | I         | 38  |           | p.V353L  | PIKAAMHFRYNLIVLG              | II        |
| 13  | FNGAL1   | p.F100R  | RTQDAEFLK | I         | 39  | MEGF8     | p.G2723R | AGVATLLQLLGRPHAP              | II        |
| 14  |          |          | DRTQDAEFL | I         | 40  | XPO5      | p.F920Y  | ENYEALVSPILGPLTYLHMRLSQWQVI   | II        |
| 15  | TGIF1    | p.M226L  | RLLPDLLRK | I         | 41  | KCNK5     | p.R112C  | GCLFCVFTGLFGVPLC              | II        |
| 16  | CDC45    | p.L202V  | KTFGVRTFA | I         | 42  | KIF26B    | p.S553Y  | DGCVFCFGHAKLGIYTI             | II        |
| 17  | ZNF562   | p.F268C  | CTNFSQLSA | I         | 43  | NUP160    | p.L308V  | EHDAFIFALCQDHKVRMSYKEQMLMVA   | II        |
| 18  |          |          | KTKNCGKSC | I         | 44  | ECI1      | p.Y136D  | AGYNKAVQELMLRLDQSNLVLVSAINGAC | II        |
| 19  | PARP4    | p.T1170I | LSKENSLLI | I         | 45  | FNGAL1    | p.F100R  | RTQDAEFLKHLNEFL               | II        |
| 20  | TUT1     | p.R36T   | EYRTVAMAA | I         | 46  | CARD11    | p.M369I  | GKDCMYKRRNTVILQLEEV           | II        |
| 21  | ARHGAP39 | p.N837S  | HMDPVSOTK | I         | 47  | TUT1      | p.R36T   | RWWQCLCFCRYRTVMAAVSDVE        | II        |
| 22  | CARD11   | p.M369I  | KHRMNTVIL | I         | 48  | PCBP1     | p.G52W   | RIREESGARINISEW               | II        |
| 23  | UNKL     | p.F250H  | YRSTPCHSV | I         | 49  | INTS1     | p.R1657G | FGFYLLTLFTWQSSWF              | II        |
| 24  |          |          | RSTPCHSVK | I         | 50  | MTMR12    | p.R642H  | GPEIKVWAQHYLRNIPFAQLGGG       | II        |
| 25  |          |          | QYRSTPCHS | I         | 51  | USP9X     | p.G2131R | AKLIVFIANFSLQDRFCPSF          | II        |
| 26  | AP4B1    | p.T89R   | LLAINRLCK | I         | 52  | ARHGAP39  | p.N837S  | SYLEGYIYRMDPVSOTKQVAISTYKY    | II        |
|     |          |          |           |           | 53  | ARHGAP39  | p.N837S  | GYIYRMDPVSOTKVTQHIKELLE       | II        |
|     |          |          |           |           | 54  | FCNKL2    | p.G2111A | LHDCIAEAVADTIAVV              | II        |
|     |          |          |           |           | 55  | TEC1D9B   | p.L714V  | LQVALAVLDANMEQV               | II        |
|     |          |          |           |           | 56  | ZNF562    | p.F268C  | GKSCNTFSQLSAHAKTHK            | II        |
|     |          |          |           |           | 57  | RAB11FIP3 | p.V298L  | FDEFDDFLTYEANEVTD             | II        |
|     |          |          |           |           | 58  | AP4B1     | p.T89R   | APLNFDLALLAINRLCKD            | II        |
|     |          |          |           |           | 59  | TGIF1     | p.M226L  | CNWFINARRLLPDLLRK             | II        |
|     |          |          |           |           | 60  | GALNS     | p.C507S  | GCEKLGKSLTFPESIPKKCLW         | II        |
|     |          |          |           |           | 61  | PTEN7     | p.Y239F  | YDGKEKVFIAQTGGMNTVSDF         | II        |
|     |          |          |           |           | 62  | PARP4     | p.T1170I | KSLIITKSKENSLLIQTFSFAVEKRDN   | II        |
|     |          |          |           |           | 63  | UNKL      | p.P250H  | RRNPRRFQYRSTPCHSVKHGD         | II        |
|     |          |          |           |           | 64  | PPP1R13L  | p.D633H  | ARLNFLVLLHAALTGELEVQ          | II        |
|     |          |          |           |           | 65  | CYP2D6    | p.V370I  | IHEVQRFGDIIPLGVTHMTSRDIEV     | II        |



**Table S4.** All oligonucleotides and plasmids used for cloning and amplification are shown.

| Construct      | Cloning oligos    | Sequence (5' → 3')                                         | Plasmid | Marker gene |
|----------------|-------------------|------------------------------------------------------------|---------|-------------|
| A1*1101        | HLA 1101 For      | CGCGGATCCACCATG GCCGTCATGGCGCC                             | pLZRS   | NGFR        |
|                | HLA 1101Rev       | CCGGAATTCACACTTTACAAGCTGTGAG                               |         |             |
| DRB1*1501      | HLA DRB For       | CGCGGATCCACCATGGTGTGTCTGAAGCTCC                            | MP71    | NGFR        |
|                | HLA DRB Rev       | CCGGAATTCAGCTCAGGAATCCTGTTGG                               |         |             |
| DPB1*0201      | HLA DPA1 0103 For | CGCGGATCCACCATGCGCCCTGAAGACAGAATG                          | pLZRS   | NGFR        |
|                | HLA DPA1 0103 Rev | CTCCACGTCACCGCATGTTAGAAGACTTCTCTGCCCTCCAGGGTCCCCTGGGCCC    |         |             |
|                | HLA DPB1 0201 For | TCTAACATGCGGTGACGTGGAGGAGAATCCCGGCCCTATGATGGTTCTGCAGGTTTCT |         |             |
|                | HLA DPB1 0201 Rev | CCGGAATTCCTATGCAGATCCTCGTTGAAC                             |         |             |
| DPB1*0401      | HLA DPA1 0103 For | CGCGGATCCACCATGCGCCCTGAAGACAGA ATG                         | pLZRS   | NGFR        |
|                | HLA DPA1 0103 Rev | CTCCACGTCACCGCATGTTAGAAGACTTCTCTGCCCTCCAGGGTCCCCTGGGCCC    |         |             |
|                | HLA DPB1 0401 For | TCTAACATGCGGTGACGTGGAGGAGAATCCCGGCCCTATGATGGTTCTGCAGGTTTCT |         |             |
|                | HLA DPB1 0401 Rev | CCGGAATTCCTATGCAGATCCTCGTTGAAC                             |         |             |
| DRB1*0701      | HLA DRB1 0701 For | CGCGGATCCACCATG GTGTGTCTGAAGCTCC                           | pLZRS   | NGFR        |
|                | HLA DRB1 0701 Rev | CCGGAATTCAGCTCAGGAATCCTGTTGG                               |         |             |
| DQB1*0202      | HLA DQA1 0201 For | CGCAGATCTACCATGATCCTAAACAAAGCTCTG                          | pLZRS   | NGFR        |
|                | HLA DQA1 0201 Rev | CTCCACGTCACCGCATGTTAGAAGACTTCTCTGCCCTCAAGGGCCCTTGGTGCTG    |         |             |
|                | HLA DQB1 0202 For | TCTAACATGCGGTGACGTGGAGGAGAATCCCGGCCCTATGTCTTGAAAAAGGCTT    |         |             |
|                | HLA DQB1 0202 Rev | CCGGAATTCAGTGCAGGAG CCCTTTC                                |         |             |
| RBMX wt/T55I   | RBMX Start For    | CGCGGATCCACCATGGTTGAAGCAGATCGCC                            | MP71    | GFP         |
|                | RBMX Stop Rev     | CCGGAATCTAGTATCTGCTTCTGCCTCC                               |         |             |
| RBMX T55I      | RBMX mut For      | GCTTTGTCACTTTGAAAGCCAGC                                    | MP71    | GFP         |
|                | RBMX mut Rev      | GGGCTTTCAAAGATGACAAAAGCAAATCC                              |         |             |
| PNMAL wt/P100R | PNMAL Start For   | CGCAGCGTCCACCATGTCCAAGACCATGGCGATG                         | MP71    | GFP         |
|                | PNMAL Stop Rev    | CGCTCGAGTCAAACCTTCTGGATTATTGGT                             |         |             |
| PNMAL P100R    | PNMAL mut For     | CTGTAGAGACCGTACCCAGGATGCTGAG                               | MP71    | GFP         |
|                | PNMAL mut Rev     | CATCTGGGTACGGTCTCTACAGACCAC                                |         |             |
| CARS wt/Q171H  | CARS2 Start For   | CGCAGCGTCCACCATGTTGAGGACTAC                                | MP71    | GFP         |
|                | CARS2 Stop Rev    | CGCTCGAGTCAGCCCGCTGATTTTGG                                 |         |             |
| CARS2 Q171H    | CARS2 mut For     | GAAAATATTCTCACATAATTTCTTTCATTG                             | MP71    | GFP         |
|                | CARS2 mut Rev     | GAAAGAAATTATGTGAGGAATATTTTCGGTTAC                          |         |             |

Figures and legends

Figure S1

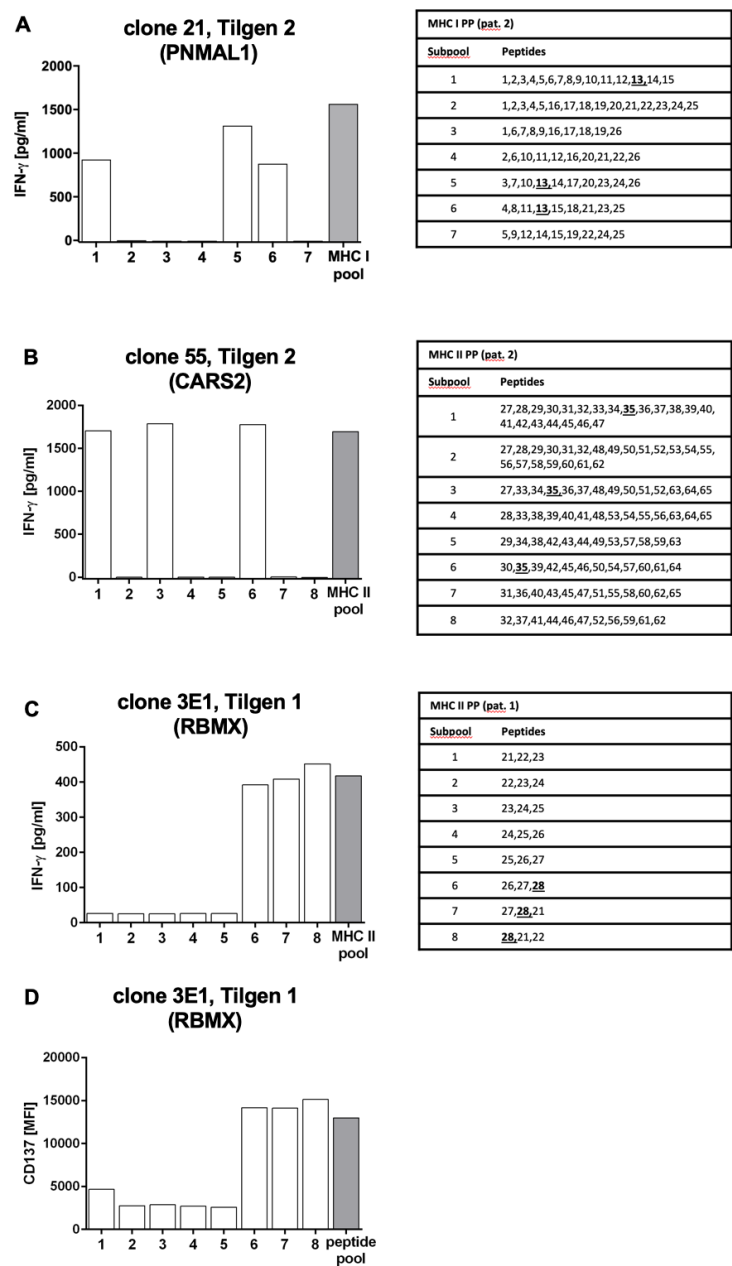

**Fig. S1.** Peptides of the respective MHC class I or II pool were subpooled and tested for recognition by the T-cell clones in an IFN- $\gamma$  ELISA. The IFN- $\gamma$  assay results are shown for (A) PNMAL1, (B) CARS2, and (C) RBMX. (D) Upregulation of CD137 as measured by flow cytometry upon peptide stimulation is shown for RBMX.

Figure S2

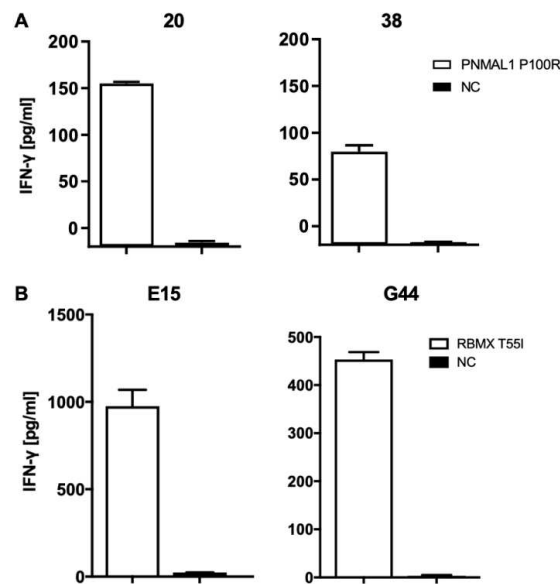

**Fig. S2.** Additional peptide pool reactive CD8+ T-cell clones from patient 2 (n=30) and CD4+ T-cell clones from patient 1 (n=2) were tested against PNMAL1 P100R (A) and RBMX T55I (B) peptides in an IFN- $\gamma$  ELISA. For patient 2, two exemplary clones are depicted. NC (negative control): autologous EBV-LCL.

Figure S3

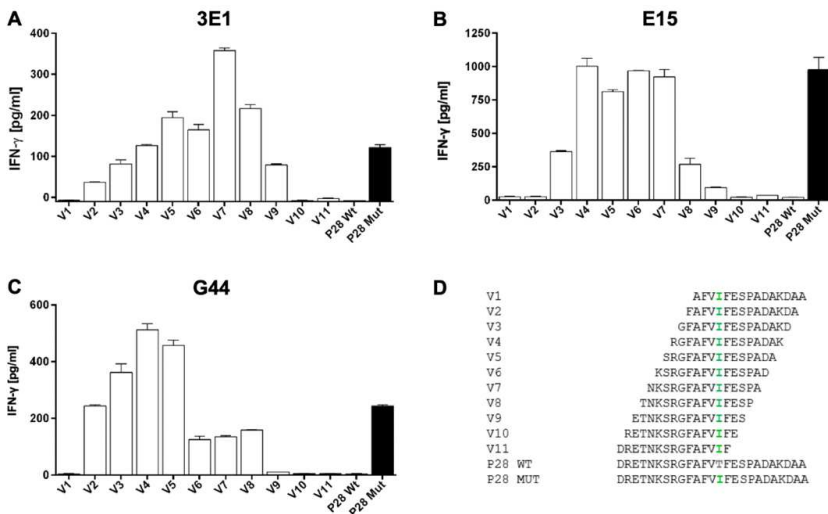

**Fig. S3** The core epitope of RBMX T55I was identified for all three T-cell clones (A) 3E1, (B) E15, and (C) G44 by testing recognition of truncated peptides (D) loaded onto autologous EBV-LCL as measured in an IFN- $\gamma$  ELISA. The means and SEM of duplicates are shown.

Figure S4

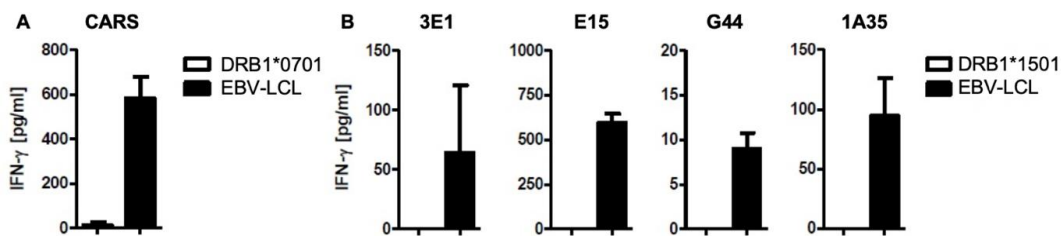

**Fig. S4.** T-cell recognition of HeLa cells retrovirally transduced with the predicted HLA-DRB1\*0701/DRA1\*0102 (A) and HLA-DRB1\*1501/HLA-DRA\*0102 (B). Depicted are the mean and SEM of triplicates (A) or duplicates (B) as measured after loading with CARS2 Q171H (A) and RBMX T55I (B) peptide. HLA compatible peptide-loaded EBV-LCLs were used as controls.

Figure S5

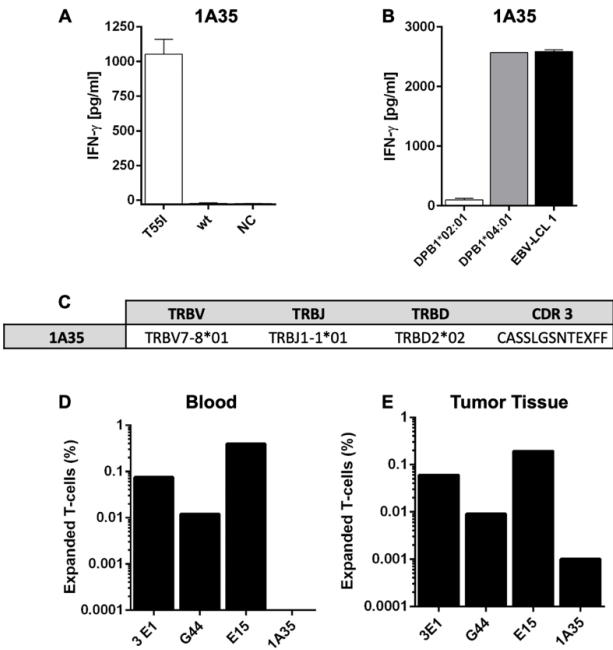

**Fig. S5.** RBMX T55I specific T-cell responses persist after neoadjuvant chemotherapy. (A) CD4+ T-cell clone 1A35 isolated from resected tumor tissue after neoadjuvant chemotherapy specifically recognizes RBMX T55I but not wt RBMX as measured in an IFN-γ ELISA against peptide-loaded autologous EBV-LCL from patient 1. Depicted are the mean and SEM of triplicates. NC: negative control (unloaded autologous EBV-LCL). (B) 1A35 recognizes peptide loaded HeLa cells retrovirally transduced with HLA-DPB1\*0401, but not HLA-DPB1\*0201 in the IFN-γ ELISA. Depicted are the mean and SEM of duplicates. (C) TCR sequencing of T-cell clone 1A35 reveals a differential variable beta chain and a unique CDR3 region. Clonotypic qPCR of all four RBMX T55I specific T-cell clones in blood (D) and tumor tissue (E) before and after neoadjuvant chemotherapy.

**Figure S6**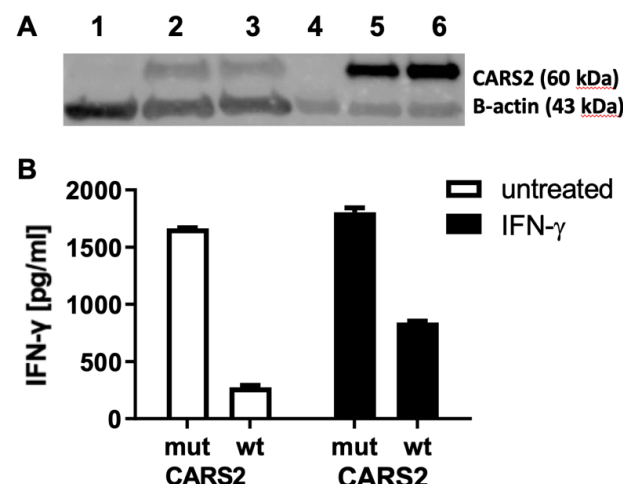

**Fig. S6.** (A) Western blot analysis of whole cell lysates of CARS2 mut/wt transduced and untransduced cells as control: 1- EBV-LCL 050; 2 - EBV-LCL 050 CARS2 mut; 3 - EBV-LCL CARS2 wt; 4 - MCF-7 wt; 5 - MCF-7 CARS2 mut; and 6 - MCF-7 CARS2 wt. Beta-actin serves as loading control. (B) T-cell recognition of CARS2 specific T-cell clone 55 of MCF-7 cell transduced with CARS2 Q171H and the HLA-DQ restriction molecule and additionally pulsed with the indicated peptide variants of CARS2 (wt or mut) as measured by IFN- $\gamma$  ELISA.

## References

1. Wurfel F, Erber R, Huebner H, et al: TILGen: A Program to Investigate Immune Targets in Breast Cancer Patients - First Results on the Influence of Tumor-Infiltrating Lymphocytes. *Breast Care (Basel)* 13:8-14, 2018
2. Erber R, Hartmann A, Beckmann MW, et al: [TILGen study-immunological targets in patients with breast cancer : Influence of tumor-infiltrating lymphocytes]. *Pathologe* 39:236-240, 2018
3. Griffioen M, van Egmond HME, Barnby-Porritt H, et al: Genetic engineering of virus-specific T cells with T-cell receptors recognizing minor histocompatibility antigens for clinical application. *Haematologica* 93:1535, 2008
4. Vonderheide RH, Domchek SM, Clark AS: Immunotherapy for Breast Cancer: What Are We Missing? *Clin Cancer Res* 23:2640-2646, 2017
5. Brochet X, Lefranc MP, Giudicelli V: IMGT/V-QUEST: the highly customized and integrated system for IG and TR standardized V-J and V-D-J sequence analysis. *Nucleic Acids Res* 36:W503-8, 2008
